# Supplementary material
Source: publisher figshare collection journal article supplement (https://tandf.figshare.com/ndownloader/files/13563299)
Supplement: Supplementary file 1 [file 13563299]

**Supplementary Material**

**Cited Chinese Tweets with English Translation**

Alphabetical order by pseudonym.

| **Twitter User** | **Chinese Tweets** | **English Translation of Tweets** |
| --- | --- | --- |
| Bitinn | 解决环境问题首先要解决民主问题；调动政治力量对解决环境问题至关重要。 | Solve democracy crisis before solve climate crisis; it is important to motivate political action in order to solve environmental problems。 |
| gong | 柴静拍了一部关于雾霾的灾难片。如果愿意，你可以再拍起码十部类似的灾难片来剖析水污染、重金属污染、食品污染问题。尽管具体原因可能各不相同，但保证每一部都可以让人大吃一惊。只要你不是脑残，你应该不难发现，这背后很明显有更深层的原因。最经典的概括：一党独裁遍地是灾。 | Chai Jing made a disaster documentary on smog, and you can make at least 10 similar disaster documentaries to explain issues such as water pollution, heavy mental pollution, and food contamination to the public. Although the sources of pollutions might differ, but each documentary could be shocking. As long as you are not an idiot, it is not difficulty find the reason underneath. A classic summary: one party leads to disasters all over. |
|  |  |  |
| **Twitter User** | **Chinese Tweets** | **English Translation of Tweets** |
| gong | 你党每次搞出个大灾难，第一步是遮掩；第二步是辟谣；第三步是恐吓。问题实在捅太大捂不住的时候，共产党就会拿出撒手锏，即在把自己责任撇干净的同时，把自己塑造成关心人民，拯救人民于苦难的形象。这个解释可以帮助更多人看懂柴静这部片子。 | Whenever the party makes a big disaster, their first reaction is to cover it, the second reaction is to deny the ‘rumor’, and the third is to terrify. When the problem is too big, the party will use its strongest weapon—denying the government’s responsibility as well as well creating a government image of caring and saving the general public. This explanation can help many people to understand Chai Jing’s documentary. |
| xuezhe | 柴静视频被发现各种数据、图表造假，有的很明显是有意捏造数据……我不相信柴静有辨别数据和图表真假的能力，她不过是被当工具利用。 | Chai Jing’s documentary has been found to forge data and tables in showing the results, and some of them are clearly intentional……I do not believe Chai Jing has the ability of identifying the validity of the data and data analysis, so she has just been used as a tool. |
| **Twitter User** | **Chinese Tweets** | **English Translation of Tweets** |
| xuezhe | 柴静视频里的数据造假令人震惊。这种程度的造假别说10处，如果有1处出现在已发表的期刊论文里，你就在西方学术圈立刻身败名裂了。如果是毕业论文数据造假，追查出来后被取消学位也是有可能的，导师还会受牵连被耻笑质疑。 | The fake data in Chai Jing's documentary is astonishing. Do not even mention 10 places of fake data, even if one that kind of mistake is found in a published journal article, your reputation is totally crashed in Western academic networks. If it is a dissertation or thesis for getting the degree, your degree might be revoked, and your advisor will also be challenged and laughed at. |
| Xiuli | 关于雾霾，长沙一伙公民在14年就拍了一个名字叫《雾霾》的视频，，片子很唯美，比柴静的雾霾纪录片《穹顶之下》时间更早更有深意。女主角在拍片期间无端被陌生人袭击。工作室设备在剪辑期间被政府全部没收。从那时起，参与者被政府一直被骚扰至今。所以，环境雾霾的问题完全可以被政治雾霾掩盖得干干净净。 | About smog issues, a few citizens in Changsha made a video titled 'Smog,' a very beautiful video. It was made earlier than Chai Jing's Under the Dome and provided more in-depth analysis. At the filming stage, the female first anchor was attacked by strangers for no reason. When the video was at the editing stage, all the machines in the studio were taken away by the government. Since then, all the individuals who participated in the production of the video have been harassed by the government. So, the topic of air pollution can be totally covered by political pollution. |
| **Twitter User** | **Chinese Tweets** | **English Translation of Tweets** |
| zuojia | 看了柴静的《苍穹之下》，我的观点是：一个权力不受限的政府才是我们生活中最大的污染源。如果不看到这一点，那就是没看到问题的核心本质。 | After watching Chai Jing’s *Under the Dome*, my point of view is that a government without restrictions of power is the most important source of pollution in our life. Unless we see this key point, we do not see the core of the problem。. |

Note: In order to protect the anonymity of the Twitter users, the Chinese tweets have been slightly modified from the original tweets without changing the meanings significantly.
